# Supplementary material for: Astragalus polysaccharide (PG2) Ameliorates Cancer Symptom Clusters, as well as Improves Quality of Life in Patients with Metastatic Disease, through Modulation of the Inflammatory Cascade
Source: PubMed Central journal article supplement (PMC6721312; doi:10.3390/cancers11081054), 2019-07-25
Supplement: cancers-11-01054-s001.pdf [file cancers-11-01054-s001.pdf]

Supplementary Materials

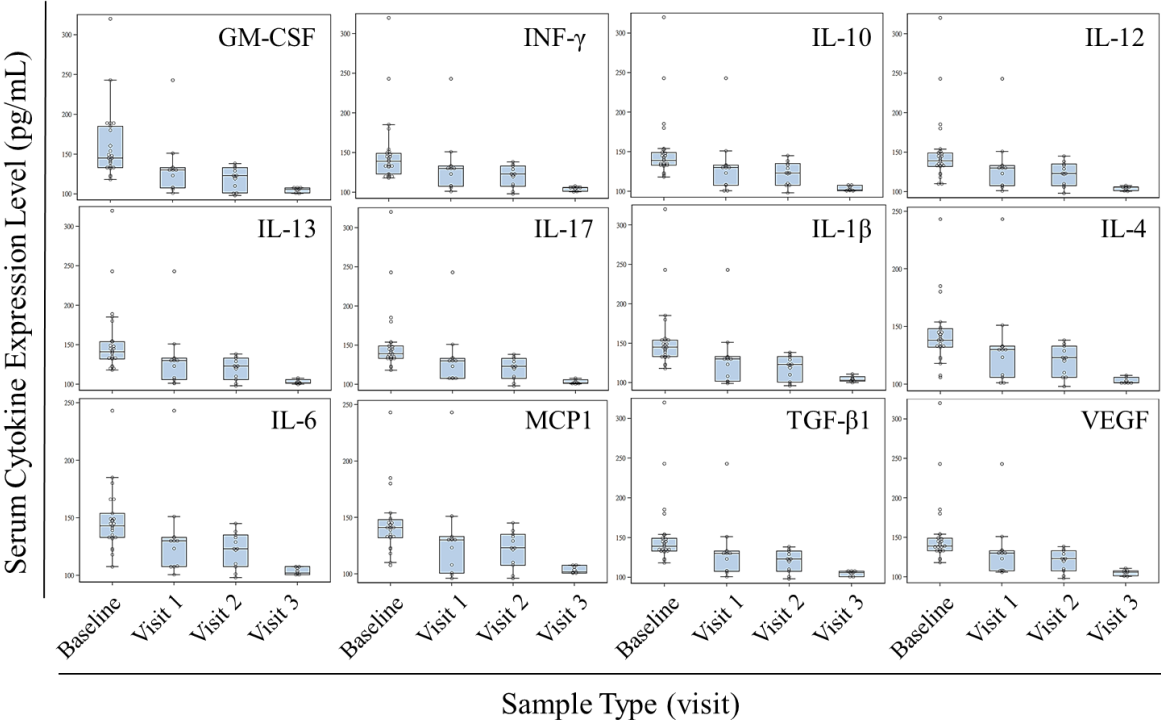

**Figure S1.** Graphical representation of the individual inflammatory cytokine level in each patient from our advanced progressive metastatic cancer cohort.

**Table S1.** PG2-induced alteration in patients' inflammatory cytokine profile at baseline, first, and last visits.

|                |          | <b>Baseline</b>    | <b>v1</b>          | <b>v3</b>         |
|----------------|----------|--------------------|--------------------|-------------------|
| IL-1 $\beta$   | High     | 154.8 $\pm$ 33     | 130.4 $\pm$ 15.27  | 103.13 $\pm$ 3.19 |
|                | Low      | 156.23 $\pm$ 54.25 | 132.97 $\pm$ 55.44 | 106.1 $\pm$ 4.55  |
|                | combined | 155.5 $\pm$ 44.3   | 131.8 $\pm$ 40.4   | 104.4 $\pm$ 3.8   |
| IL-4           | High     | 153.35 $\pm$ 33.39 | 130.4 $\pm$ 15.27  | 101.31 $\pm$ 0.24 |
|                | Low      | 133.61 $\pm$ 20.44 | 134.07 $\pm$ 54.7  | 104.86 $\pm$ 3.29 |
|                | combined | 143.1 $\pm$ 28.6   | 132.4 $\pm$ 39.9   | 102.8 $\pm$ 2.7   |
| IL-6           | High     | 155.9 $\pm$ 33.17  | 130.4 $\pm$ 15.27  | 102.82 $\pm$ 3.19 |
|                | Low      | 139.54 $\pm$ 20.6  | 135.3 $\pm$ 53.9   | 104.66 $\pm$ 3.64 |
|                | combined | 147.4 $\pm$ 28     | 133.1 $\pm$ 39.4   | 103.6 $\pm$ 3.2   |
| MCP1           | High     | 153.63 $\pm$ 33.26 | 130.4 $\pm$ 15.27  | 104.2 $\pm$ 3.85  |
|                | Low      | 134.21 $\pm$ 20.03 | 131.95 $\pm$ 56.17 | 102.7 $\pm$ 2.8   |
|                | combined | 143.5 $\pm$ 28.3   | 131.2 $\pm$ 40.9   | 103.6 $\pm$ 3.3   |
| IL-10          | High     | 153.08 $\pm$ 33.54 | 130.4 $\pm$ 15.27  | 104.2 $\pm$ 3.85  |
|                | Low      | 152.25 $\pm$ 55.5  | 134.14 $\pm$ 54.68 | 102.7 $\pm$ 2.8   |
|                | combined | 152.6 $\pm$ 45.3   | 132.4 $\pm$ 39.9   | 103.6 $\pm$ 3.3   |
| IL-12          | High     | 150.81 $\pm$ 35.66 | 130.4 $\pm$ 15.27  | 104.96 $\pm$ 3.03 |
|                | Low      | 151.41 $\pm$ 56.1  | 135.12 $\pm$ 53.99 | 103.02 $\pm$ 2.5  |
|                | combined | 151.1 $\pm$ 46.4   | 133 $\pm$ 39.5     | 104.1 $\pm$ 2.8   |
| IL-13          | High     | 151.72 $\pm$ 34.63 | 130.4 $\pm$ 15.27  | 102.48 $\pm$ 3.41 |
|                | Low      | 156.75 $\pm$ 56.16 | 134.15 $\pm$ 54.64 | 103.18 $\pm$ 2.34 |
|                | combined | 154.3 $\pm$ 46.1   | 132.4 $\pm$ 39.9   | 102.8 $\pm$ 2.8   |
| IL-17          | High     | 153.08 $\pm$ 33.54 | 130.4 $\pm$ 15.27  | 101.16 $\pm$ 0.45 |
|                | Low      | 153.75 $\pm$ 54.79 | 136.46 $\pm$ 53.07 | 105.13 $\pm$ 2.84 |
|                | combined | 153.4 $\pm$ 44.9   | 133.7 $\pm$ 38.9   | 102.9 $\pm$ 2.7   |
| GM-CSF         | High     | 157.99 $\pm$ 34.56 | 130.4 $\pm$ 15.27  | 104.2 $\pm$ 3.85  |
|                | Low      | 162.5 $\pm$ 55.59  | 135.12 $\pm$ 53.99 | 106.42 $\pm$ 0.96 |
|                | combined | 160.3 $\pm$ 45.8   | 133 $\pm$ 39.5     | 105.2 $\pm$ 3     |
| VEGF           | High     | 153.35 $\pm$ 33.39 | 130.4 $\pm$ 15.27  | 103.79 $\pm$ 3.44 |
|                | Low      | 154 $\pm$ 54.7     | 136.18 $\pm$ 53.25 | 108.06 $\pm$ 2.49 |
|                | combined | 153.7 $\pm$ 44.8   | 133.6 $\pm$ 39     | 105.6 $\pm$ 3.6   |
| TGF- $\beta$ 1 | High     | 153.08 $\pm$ 33.54 | 130.4 $\pm$ 15.27  | 105.79 $\pm$ 3.48 |
|                | Low      | 153.5 $\pm$ 54.88  | 135.02 $\pm$ 54.07 | 104.1 $\pm$ 3.06  |
|                | combined | 153.3 $\pm$ 44.9   | 132.9 $\pm$ 39.5   | 105.1 $\pm$ 3.2   |
| IFN- $\gamma$  | High     | 151.72 $\pm$ 34.63 | 130.4 $\pm$ 15.27  | 104.96 $\pm$ 3.03 |
|                | Low      | 151 $\pm$ 56.09    | 135.12 $\pm$ 53.99 | 104.31 $\pm$ 2.7  |
|                | combined | 151.3 $\pm$ 46     | 133 $\pm$ 39.5     | 104.7 $\pm$ 2.7   |
